# Supplementary material
Source: PubMed Central journal article supplement (PMC6499130)
Supplement: jamaotolaryngolheadnecksurg-145-1121-s001.pdf [file jamaotolaryngolheadnecksurg-145-1121-s001.pdf]

## Supplementary Online Content

Mowery A, Conlin M, Clayburgh D. Risk of head and neck cancer in patients with prior hematologic malignant tumors. *JAMA Otolaryngol*. Published online May 2, 2019.  
doi:10.1001/jamaoto.2019.1012

### **eTable.** ICD Codes for Cancer Subsites

This supplementary material has been provided by the authors to give readers additional information about their work.

**eTable.** ICD Codes for Cancer Subsites

|                                 | ICD-9 Code  | N     | ICD-10 Code | N     |
|---------------------------------|-------------|-------|-------------|-------|
| <b>Hematologic Malignancies</b> |             |       |             |       |
|                                 | 200         | 2162  | C80         | 8095  |
|                                 | 201         | 7768  | C81         | 506   |
|                                 | 202         | 7466  | C82         | 2847  |
|                                 | 203         | 8652  | C83         | 24049 |
|                                 | 204         | 59427 | C84         | 4305  |
|                                 | 205         | 4233  | C85         | 1465  |
|                                 | 206         | 1567  | C86         | 609   |
|                                 | 207         | 1382  | C88         | 613   |
|                                 | 208         | 273   | C90         | 12515 |
|                                 |             |       | C91         | 30881 |
|                                 |             |       | C92         | 10201 |
|                                 |             |       | C93         | 2239  |
|                                 |             |       | C94         | 15325 |
|                                 |             |       | C95         | 620   |
|                                 |             |       | C96         | 122   |
| <b>Oral Cavity</b>              |             |       |             |       |
|                                 | 140.0-9     | 3050  | C00.0-9     | 175   |
|                                 | 141.1-9     | 8506  | C02.0-9     | 1294  |
|                                 | 143.0-9     | 400   | C03.0-9     | 32    |
|                                 | 144.0-9     | 1810  | C04.0-9     | 451   |
|                                 | 145.0-2,4-9 | 8137  | C05.0,2-9   | 157   |
|                                 | 149.0-9     | 2982  | C06.0-9     | 338   |
|                                 |             |       | C14.0-9     | 589   |
| <b>Oropharynx</b>               |             |       |             |       |
|                                 | 141.0       | 2692  | C01.0-9     | 1867  |
|                                 | 145.3       | 515   | C05.1       | 127   |
|                                 | 146.0-9     | 9997  | C09.0-9     | 3087  |
|                                 |             |       | C10.0-9     | 1842  |
| <b>Larynx</b>                   |             |       |             |       |
|                                 | 161.0-9     | 26248 | C32.0-9     | 5799  |
| <b>Hypopharynx</b>              |             |       |             |       |
|                                 | 148.0-9     | 2271  | C12.0-9     | 147   |
|                                 |             |       | C13.0-9     | 452   |
| <b>Nasopharynx</b>              |             |       |             |       |
|                                 | 147.0-9     | 1653  | C11.0-9     | 474   |
| <b>Sinonasal</b>                |             |       |             |       |
|                                 | 160.0-9     | 1666  | C30.0-9     | 217   |
|                                 |             |       | C31.0-9     | 263   |
| <b>Salivary Gland</b>           |             |       |             |       |
|                                 | 142.0-9     | 7513  | C07.0-9     | 965   |
|                                 |             |       | C08.0-9     | 225   |
| <b>Thyroid</b>                  |             |       |             |       |
|                                 | 193.0-9     | 15100 | C73.0-9     | 2954  |
